# Supplementary material for: Monitoring Volatile Organic Compounds in Different Pear Cultivars during Storage Using HS-SPME with GC-MS
Source: MDPI journal article supplement (doi:10.3390/foods11233778), 2022-11-23
Supplement: s1 [file s1]

## **Supplementary Material**

### **Monitoring Volatile Organic Compounds in Different Pear Cultivars During Storage Using HS-SPME With GC-MS**

Guanwei Gao <sup>1,2</sup>, Xinnan Zhang <sup>1,3</sup>, Zhen Yan <sup>1,2</sup>, Yang Cheng <sup>1,2</sup>, Haifei Li <sup>1,2</sup>, Guofeng Xu <sup>1,2\*</sup>

<sup>1</sup> Ministry of Agriculture and Rural Affairs, Institute of Pomology, Chinese Academy of Agricultural Sciences, Xingcheng 125100, China

<sup>2</sup> Laboratory of Quality & Safety Risk Assessment for Fruit, Xingcheng 125100, China

<sup>3</sup> Key Laboratory of Germplasm Resources Utilization of Horticultural Crops, Ministry of Agriculture and Rural Affairs, Xingcheng 125100, China

\* Correspondence: xuguofeng@caas.cn

## **Table of content**

|                                                                                         |     |
|-----------------------------------------------------------------------------------------|-----|
| I. Photographs of 12 pear cultivars fruits.....                                         | S3  |
| II. Photographs of pear sample with NaCl addition before and after homogenization ..... | S4  |
| III. Concentration of VOCs in fruits of 12 pear cultivars .....                         | S5  |
| IV. Principal component analysis (PCA) of VOCs in 12 pear cultivars.....                | S11 |
| V. The conversion pathway of VOCs in pear fruit during storage .....                    | S12 |

I. Photographs of 12 pear cultivars fruits

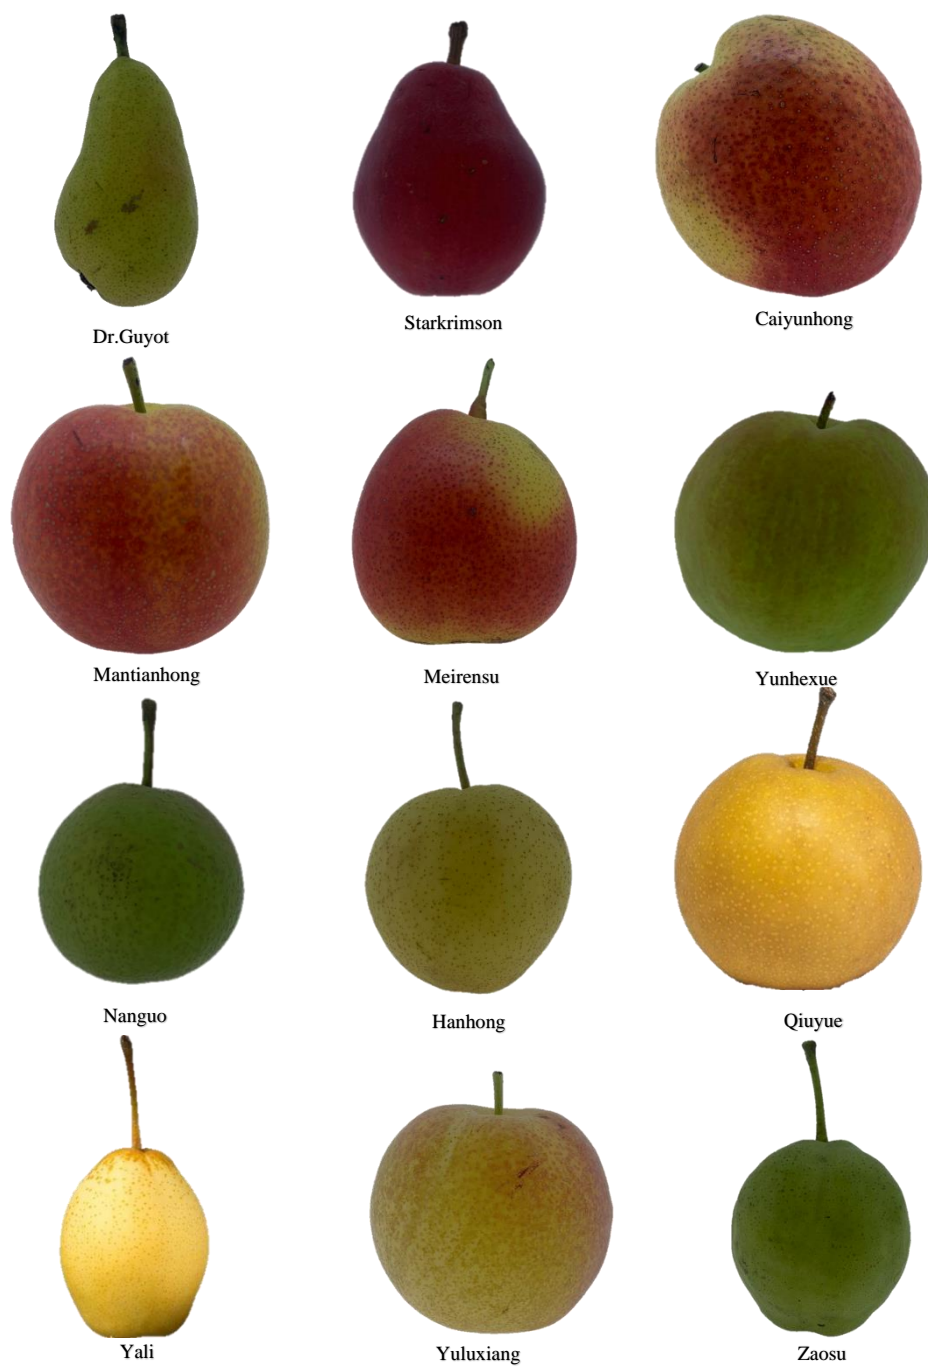

Figure S1. Photographs of 12 pear cultivars fruits.

## II. Photographs of pear sample with NaCl addition before and after homogenization

Salt was widely used in previous studies to enhance the dissociation of VOCs. At first, 5.0 g of sliced pear fruit and 5.0 g NaCl were placed into a SPME vial. Browning of pear fruit occurred rapidly and resulted in color changes (Figure S2b) and loss of flavor. In this study, NaCl was directly mixed with sliced pear fruit (1:1, m/m) before homogenization. As shown in Figure S2a, the color of the pear matrix was less intense and prevented browning from developing.

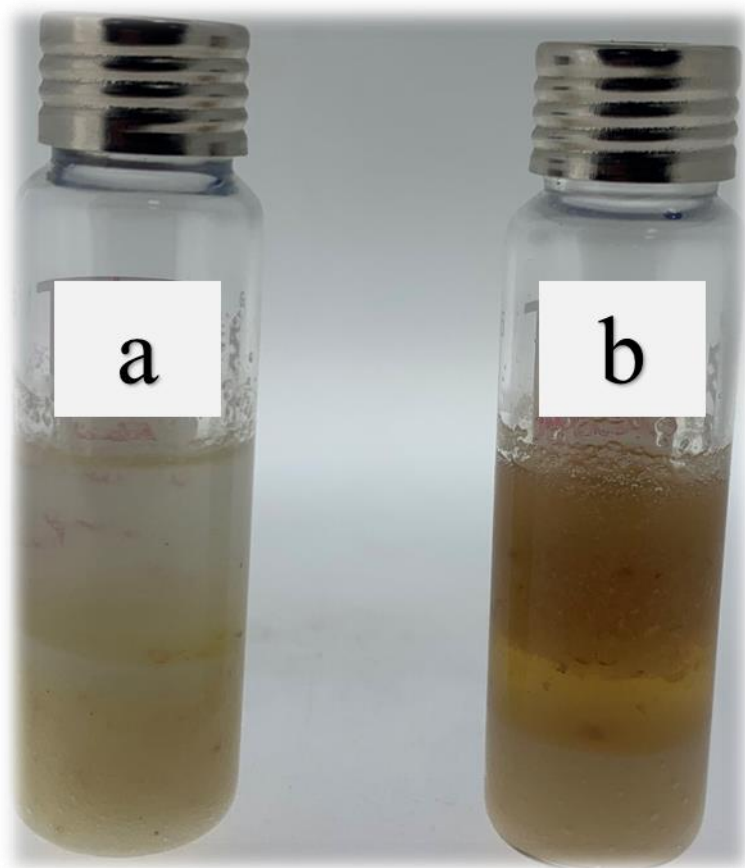

**Figure S2.** Photographs of pear sample with NaCl addition before (a) and after (b) homogenization.

### III. Concentration of VOCs in fruits of 12 pear cultivars

**Table S1.** Concentration of VOCs in fruits of 12 pear cultivars.

|           |                        | RT<br>(min) | Concentration Of VOCs (mg/kg FW) |                 |                |                 |              |              |            |             |        |      |               |       |
|-----------|------------------------|-------------|----------------------------------|-----------------|----------------|-----------------|--------------|--------------|------------|-------------|--------|------|---------------|-------|
| Compounds |                        |             | Dr.<br>Guyot                     | Starkrim<br>son | Caiyunh<br>ong | Mantianho<br>ng | Meiren<br>su | Yunhex<br>ue | Nang<br>uo | Hanhon<br>g | Qiuyue | Yali | Yuluxia<br>ng | Zaosu |
| Ester     |                        |             |                                  |                 |                |                 |              |              |            |             |        |      |               |       |
| 1         | Ethyl butyrate         | 10.62       | -                                | -               | 1.07           | 1.06            | 0.31         | -            | -          | 0.02        | -      | -    | -             | -     |
| 2         | Ethyl 2-methylbutyrate | 11.19       | -                                | -               | 0.12           | 0.12            | -            | -            | -          | -           | -      | -    | -             | -     |
| 3         | Butyl acetate          | 11.97       | 7.18                             | 0.23            | -              | -               | -            | 0.09         | 0.06       | 0.01        | 0.01   | -    | -             | 0.01  |
| 4         | Isoamyl acetate        | 14.26       | -                                | -               | -              | 0.02            | -            | -            | -          | -           | -      | -    | -             | -     |
| 5         | Ethyl valerate         | 14.83       | -                                | -               | 0.07           | 0.04            | -            | -            | -          | -           | -      | -    | -             | -     |
| 6         | Ethyl 2-butenoate      | 16.50       | -                                | -               | 0.09           | 0.13            | -            | -            | -          | -           | -      | -    | -             | -     |
| 7         | Pentyl acetate         | 16.91       | 0.40                             | 0.05            | -              | -               | -            | -            | -          | -           | -      | -    | -             | -     |
| 8         | Butyl butyrate         | 19.45       | 0.03                             | -               | -              | -               | -            | -            | -          | -           | -      | -    | -             | -     |
| 9         | Ethyl hexanoate        | 20.37       | -                                | -               | 0.62           | 0.50            | 0.30         | -            | -          | -           | -      | -    | -             | -     |
| 10        | Ethyl tiglate          | 20.70       | -                                | -               | 0.08           | 0.12            | -            | -            | -          | -           | -      | -    | -             | -     |
| 11        | Hexyl acetate          | 22.78       | 19.91                            | 0.63            | 0.21           | -               | 0.05         | 0.11         | 0.12       | 0.09        | -      | 0.03 | 0.06          | 0.15  |
| 12        | Ethyl heptanoate       | 26.66       | -                                | -               | 0.05           | 0.04            | 0.02         | -            | -          | -           | -      | -    | -             | -     |
| 13        | 2-Hexenyl acetate      | 26.80       | -                                | -               | 0.08           | -               | -            | 0.03         | -          | -           | -      | -    | 0.02          | 0.06  |
| 14        | Ethyl 2-hexenoate      | 27.53       | -                                | -               | 0.07           | 0.07            | -            | -            | -          | -           | -      | -    | -             | -     |
| 15        | Heptyl acetate         | 29.31       | 0.16                             | -               | -              | -               | -            | -            | -          | -           | -      | -    | -             | -     |
| 16        | Butyl hexanoate        | 31.83       | 0.26                             | 0.04            | -              | -               | -            | -            | -          | -           | -      | -    | -             | -     |
| 17        | Hexyl butyrate         | 32.02       | 0.20                             | 0.03            | -              | -               | -            | -            | -          | -           | -      | -    | -             | 0.04  |
| 18        | Ethyl octanoate        | 33.27       | -                                | -               | 0.18           | 1.33            | 1.65         | -            | -          | -           | -      | -    | -             | -     |

|    |                                     |       |      |      |      |      |      |      |      |      |      |      |      |      |
|----|-------------------------------------|-------|------|------|------|------|------|------|------|------|------|------|------|------|
| 19 | Octyl acetate                       | 35.95 | 0.40 | -    | -    | 0.02 | 0.20 | -    | -    | -    | -    | -    | -    | -    |
| 20 | 2-Octenoic acid,<br>ethyl ester     | 41.01 | -    | -    | 0.04 | 0.02 | -    | -    | -    | -    | -    | -    | -    | -    |
| 21 | Hexyl hexanoate                     | 44.44 | 0.30 | 0.04 | -    | -    | -    | -    | -    | -    | -    | -    | -    | 0.17 |
| 22 | Ethyl decanoate                     | 46.21 | -    | -    | -    | 0.07 | 0.04 | -    | -    | -    | -    | -    | -    | -    |
| 23 | Ethyl 4-decenoate                   | 47.97 | -    | -    | -    | 0.12 | -    | -    | -    | -    | -    | -    | -    | -    |
| 24 | Ethyl benzoate                      | 48.32 | -    | -    | 0.18 | 0.88 | 0.04 | -    | -    | 0.08 | -    | -    | 0.03 | -    |
| 25 | Ethyl 3-<br>hydroxyhexanoate        | 48.95 | -    | -    | 0.04 | 0.05 | -    | -    | -    | -    | -    | -    | -    | -    |
| 26 | Methyl salicylate                   | 54.90 | -    | -    | -    | -    | -    | -    | -    | 0.20 | -    | 1.39 | 0.31 | -    |
| 27 | Ethyl phenylacetate                 | 55.33 | -    | -    | -    | 0.19 | -    | -    | -    | -    | -    | -    | -    | -    |
| 28 | Phenethyl acetate                   | 57.04 | -    | -    | -    | 0.61 | -    | -    | -    | 0.25 | -    | -    | 0.09 | -    |
| 29 | Ethyl (2E,4Z)-deca-<br>2,4-dienoate | 58.22 | -    | -    | 0.22 | 0.18 | 0.07 | -    | -    | -    | -    | -    | -    | -    |
| 30 | Methyl<br>tetradecanoate            | 67.15 | -    | 0.05 | -    | -    | -    | -    | -    | -    | -    | -    | -    | -    |
| 31 | Methyl<br>pentadecanoate            | 71.06 | -    | 0.03 | -    | -    | -    | -    | -    | -    | -    | -    | -    | -    |
| 32 | $\gamma$ -Decalactone               | 72.35 | -    | 0.02 | 0.15 | 0.05 | 0.07 | 0.05 | 0.03 | -    | -    | 0.04 | 0.04 | -    |
| 33 | Acetylcugenol                       | 73.01 | -    | -    | -    | -    | -    | -    | -    | -    | -    | -    | 0.04 | -    |
| 34 | Methyl palmitate                    | 73.94 | 1.54 | 1.48 | 0.07 | 0.02 | -    | 0.02 | 0.06 | 0.09 | 0.03 | 0.01 | 0.03 | 0.20 |
| 35 | 7-Hexadecenoic<br>Acid methyl ester | 74.54 | 0.18 | 0.19 | -    | -    | -    | -    | -    | -    | -    | -    | -    | -    |
| 36 | Ethyl palmitate                     | 74.92 | 0.14 | -    | -    | -    | -    | -    | -    | -    | -    | -    | -    | -    |
| 37 | Methyl<br>linolelaidate             | 75.86 | 0.04 | -    | -    | -    | -    | -    | -    | -    | -    | -    | -    | -    |

|         |                            |       |       |      |      |      |      |      |      |      |      |      |      |      |
|---------|----------------------------|-------|-------|------|------|------|------|------|------|------|------|------|------|------|
| 38      | Methyl stearate            | 79.70 | 0.20  | 0.07 | -    | -    | -    | -    | -    | -    | -    | -    | -    | -    |
| 39      | Methyl elaidate            | 80.47 | 2.12  | 1.66 | -    | -    | -    | -    | -    | -    | -    | -    | -    | 0.04 |
| 40      | Ethyl oleate               | 81.60 | 0.14  | -    | -    | -    | -    | -    | -    | -    | -    | -    | -    | -    |
|         | Subtotal                   |       | 33.20 | 4.52 | 2.15 | 4.46 | 2.44 | 0.30 | 0.27 | 0.72 | 0.04 | 1.47 | 0.62 | 0.67 |
| Alcohol |                            |       |       |      |      |      |      |      |      |      |      |      |      |      |
| 1       | 1-Butanol                  | 15.41 | 0.84  | -    | -    | -    | -    | -    | -    | -    | -    | -    | -    | -    |
| 2       | 2-Methyl-1-butanol         | 18.76 | 0.09  | 0.03 | -    | -    | -    | -    | -    | -    | -    | -    | -    | -    |
| 3       | 1-Pentanol                 | 21.33 | -     | 0.04 | -    | -    | -    | -    | -    | -    | -    | -    | -    | -    |
| 4       | Isoamyl alcohol            | 21.35 | 0.06  | -    | -    | -    | -    | -    | -    | -    | -    | -    | -    | -    |
| 5       | 1-Hexen-3-ol               | 21.46 | -     | -    | -    | -    | -    | -    | -    | -    | -    | -    | -    | 0.04 |
| 6       | Acetic acid--hex-4-en-1-ol | 25.71 | -     | 0.06 | -    | -    | -    | -    | -    | 0.09 | -    | -    | -    | 0.05 |
| 7       | 1-Hexanol                  | 27.91 | 1.14  | 0.53 | 0.15 | 0.29 | 0.05 | 1.33 | 0.27 | 0.21 | 1.62 | 1.56 | 1.24 | 3.12 |
| 8       | 3-Hexen-1-ol               | 30.06 | -     | 0.14 | -    | -    | -    | -    | 0.22 | 0.10 | 0.13 | 0.19 | 0.04 | 0.06 |
| 9       | 2-Nonen-1-ol               | 30.66 | -     | -    | -    | -    | -    | 0.17 | -    | -    | -    | -    | -    | -    |
| 10      | Linalyl oxide              | 33.81 | 0.02  | 0.05 | 0.05 | 0.07 | 0.09 | -    | 0.32 | 0.26 | -    | -    | -    | 0.07 |
| 11      | 1-Octen-3-ol               | 34.30 | 0.84  | 0.50 | 0.04 | -    | -    | 0.04 | 0.23 | -    | -    | -    | -    | -    |
| 12      | 1-Heptanol                 | 34.57 | 0.04  | 0.10 | -    | -    | -    | -    | -    | -    | -    | -    | -    | -    |
| 13      | 2-Ethylhexanol             | 36.86 | -     | -    | -    | -    | 0.03 | -    | -    | -    | -    | -    | -    | -    |
| 14      | 3-Cyclopentyl-1-propanol   | 39.37 | 0.30  | -    | -    | -    | -    | -    | -    | -    | -    | -    | -    | -    |
| 15      | Linalool                   | 40.59 | 0.12  | -    | 0.06 | 0.03 | 0.04 | -    | -    | -    | -    | -    | -    | -    |
| 16      | 1-Octanol                  | 41.17 | 0.43  | 0.21 | 0.13 | 0.18 | 0.27 | 0.06 | 0.10 | 0.18 | -    | 0.03 | 0.04 | 0.04 |
| 17      | 2-Octen-1-ol               | 44.87 | 0.59  | 0.32 | -    | -    | -    | 0.04 | 0.11 | -    | -    | -    | -    | -    |
| 18      | 1-Nonanol                  | 47.50 | 0.13  | 0.13 | 0.09 | 0.06 | 0.02 | 0.05 | 0.06 | 0.06 | 0.04 | 0.05 | 0.05 | -    |
| 19      | $\alpha$ -Terpineol        | 49.90 | -     | -    | 0.10 | 0.07 | 0.07 | -    | -    | -    | -    | -    | -    | -    |

|          |                                    |       |      |      |      |      |      |      |      |      |      |      |      |      |
|----------|------------------------------------|-------|------|------|------|------|------|------|------|------|------|------|------|------|
| 20       | (E)-Dec-3-en-2-ol                  | 50.10 | -    | -    | -    | 0.08 | 0.02 | -    | -    | -    | -    | -    | -    | -    |
| 21       | 1-Dodecanol                        | 53.54 | -    | 0.04 | -    | -    | -    | -    | -    | -    | -    | -    | -    | -    |
| 22       | 1-Decanol                          | 53.57 | -    | -    | -    | 0.11 | 0.06 | -    | -    | -    | -    | 0.02 | -    | -    |
| 23       | Citronellol                        | 53.85 | 0.08 | -    | -    | -    | -    | -    | -    | -    | -    | -    | -    | -    |
| 24       | Z-4-Dodecenol                      | 55.58 | 0.11 | -    | 0.23 | -    | 0.32 | -    | -    | -    | -    | -    | -    | -    |
| 25       | 5-Decen-1-ol                       | 55.59 | -    | -    | -    | 0.58 | -    | -    | -    | -    | -    | -    | -    | -    |
| 26       | 3,7-Dimethylocta-<br>2,6-dien-1-ol | 58.49 | 0.03 | -    | -    | -    | -    | -    | -    | -    | -    | -    | -    | -    |
| 27       | (2Z,6E)-Farnesol                   | 59.80 | 0.22 | -    | -    | -    | -    | -    | -    | -    | -    | -    | -    | -    |
| 28       | Bergamotol                         | 60.13 | 1.45 | -    | -    | -    | -    | -    | -    | -    | -    | -    | -    | -    |
| 29       | Butylated<br>hydroxytoluene        | 62.24 | -    | -    | -    | -    | -    | 0.02 | -    | -    | -    | -    | -    | -    |
| 30       | 2-Decen-1-ol                       | 68.31 | 0.09 | -    | -    | -    | -    | -    | -    | -    | -    | -    | -    | -    |
| 31       | 5-Hexen-1-ol                       | 70.01 | 0.02 | -    | -    | -    | -    | -    | -    | -    | -    | -    | -    | -    |
| 32       | 3,5-Di-tert-<br>butylphenol        | 76.70 | 0.19 | 0.10 | 0.60 | 0.58 | 0.52 | 0.02 | 0.31 | 0.09 | 0.60 | 0.35 | 0.02 | 0.02 |
|          | Subtotal                           |       | 6.79 | 2.25 | 1.45 | 2.05 | 1.49 | 1.73 | 1.62 | 0.99 | 2.39 | 2.20 | 1.39 | 3.40 |
| Aldehyde |                                    |       |      |      |      |      |      |      |      |      |      |      |      |      |
| 1        | Hexanal                            | 12.44 | 0.12 | 0.10 | 0.36 | 0.25 | 0.19 | 0.33 | 0.28 | 0.44 | 0.44 | 0.48 | 2.00 | 0.84 |
| 2        | 2-Hexenal                          | 19.70 | 0.23 | 0.32 | 0.83 | 0.64 | 0.21 | 0.76 | 0.80 | 1.19 | 0.11 | 0.29 | 4.60 | 2.88 |
| 3        | Octanal                            | 23.92 | 0.05 | -    | 0.05 | 0.06 | 0.09 | -    | 0.06 | 0.18 | -    | -    | -    | -    |
| 4        | 2-Heptenal                         | 26.25 | 1.27 | 0.19 | -    | -    | -    | -    | 1.19 | 0.25 | -    | -    | -    | -    |
| 5        | Nonanal                            | 30.70 | 0.16 | 0.12 | 0.68 | 0.84 | 0.79 | -    | 0.25 | 0.81 | 0.17 | 0.25 | 0.25 | 0.17 |
| 6        | 2-Octenal                          | 33.11 | 0.75 | 0.21 | 0.20 | 0.03 | 0.05 | 0.05 | 0.89 | 0.36 | 0.03 | 0.03 | 0.04 | 0.03 |
| 7        | Decanal                            | 37.53 | 0.04 | -    | 0.13 | 0.03 | -    | 0.05 | 0.08 | 0.04 | 0.07 | 0.07 | 0.04 | -    |
| 8        | Benzaldehyde                       | 39.51 | -    | 0.04 | 0.20 | -    | -    | -    | -    | -    | -    | 0.03 | -    | -    |

|        |                            |       |      |      |      |      |      |      |      |      |      |      |      |       |
|--------|----------------------------|-------|------|------|------|------|------|------|------|------|------|------|------|-------|
| 9      | 2-Nonenal                  | 39.94 | 0.17 | -    | 0.10 | -    | 0.05 | -    | 0.07 | 0.06 | -    | -    | -    | -     |
| 10     | 2-Decenal                  | 46.68 | 0.88 | 0.24 | 0.08 | 0.15 | 0.22 | 0.02 | 0.73 | 0.40 | -    | -    | 0.03 | -     |
| 11     | 2,4-Nonadienal             | 50.28 | 0.17 | -    | -    | -    | -    | -    | -    | 0.06 | -    | -    | -    | -     |
| 12     | Geranial                   | 52.05 | 0.10 | -    | -    | -    | -    | -    | -    | -    | -    | -    | -    | -     |
| 13     | 2-Undecenal                | 53.12 | -    | 0.15 | -    | -    | -    | -    | -    | -    | -    | -    | -    | -     |
| 14     | 2-Dodecenal                | 53.13 | 0.56 | -    | 0.04 | -    | -    | -    | 0.33 | 0.07 | -    | -    | -    | -     |
| 15     | (E,Z)-2,4-Decadienal       | 54.02 | 0.08 | -    | -    | -    | -    | -    | -    | -    | -    | -    | -    | -     |
| 16     | 2,4-Decadienal             | 56.60 | 0.12 | -    | -    | -    | -    | -    | 0.05 | -    | -    | -    | -    | -     |
|        | Subtotal                   |       | 4.70 | 1.37 | 2.67 | 2.00 | 1.60 | 1.21 | 4.73 | 3.86 | 0.82 | 1.15 | 6.96 | 3.92  |
| Alkene |                            |       |      |      |      |      |      |      |      |      |      |      |      |       |
| 1      | Myrcene                    | 16.23 | 0.05 | -    | -    | -    | 0.03 | -    | -    | -    | -    | -    | 0.04 | -     |
| 2      | (E)- $\beta$ -Ocimene      | 20.40 | 0.03 | -    | -    | -    | -    | -    | -    | -    | -    | 0.02 | 0.04 | -     |
| 3      | Limonene                   | 18.26 | 0.03 | 0.09 | -    | 0.06 | 0.06 | -    | -    | -    | -    | -    | -    | -     |
| 4      | $\beta$ -Ocimene           | 21.48 | -    | 0.76 | -    | 0.02 | 0.02 | -    | -    | -    | -    | -    | -    | -     |
| 5      | 2,6-Dimethyl-2,6-octadiene | 31.34 | 0.37 | -    | -    | -    | -    | -    | -    | -    | -    | -    | -    | -     |
| 6      | 3,5,5-Trimethyl-2-hexene   | 36.67 | 0.03 | -    | -    | -    | -    | -    | -    | -    | -    | -    | -    | 0.22  |
| 7      | $\beta$ -Farnesene         | 47.91 | 0.23 | 0.13 | -    | -    | -    | -    | -    | 0.06 | -    | -    | -    | 0.19  |
| 8      | Isomyocorene               | 50.57 | -    | -    | -    | -    | -    | -    | -    | -    | -    | -    | 0.03 | -     |
| 9      | 9-Octadecene               | 50.79 | -    | -    | -    | -    | -    | -    | -    | -    | -    | -    | -    | -     |
| 10     | (Z,E)- $\alpha$ -Farnesene | 51.49 | 0.18 | -    | -    | -    | -    | -    | -    | -    | -    | -    | -    | 0.84  |
| 11     | (E,E)- $\alpha$ -Farnesene | 52.84 | 7.69 | -    | -    | -    | -    | -    | -    | 0.13 | -    | -    | -    | 29.51 |
| 12     | $\alpha$ -Terpinene        | 58.89 | 0.18 | -    | -    | -    | -    | -    | -    | -    | -    | -    | -    | -     |
| 13     | 1-Hexacosene               | 76.47 | -    | -    | -    | 0.07 | -    | -    | -    | -    | -    | -    | -    | -     |

|        |                       |       |      |      |      |      |      |      |      |      |      |      |      |       |
|--------|-----------------------|-------|------|------|------|------|------|------|------|------|------|------|------|-------|
|        | Subtotal              |       | 8.79 | 0.98 | -    | 0.15 | 0.11 | -    | -    | 0.19 | -    | 0.02 | 0.11 | 30.76 |
| Ketone |                       |       |      |      |      |      |      |      |      |      |      |      |      |       |
| 1      | 4-Hexen-3-one         | 11.82 | 0.03 | 0.02 | -    | -    | -    | -    | 0.03 | 0.01 | -    | -    | -    | -     |
| 2      | 3-Octanone            | 21.68 | 0.06 | 0.13 | -    | -    | -    | 0.02 | 0.06 | -    | -    | -    | -    | -     |
| 3      | 2-octanone            | 23.64 | -    | -    | 0.05 | -    | -    | 0.02 | -    | -    | 0.11 | -    | -    | -     |
| 4      | 1-Hepten-3-one        | 24.72 | 0.32 | 0.09 | 0.14 | -    | -    | 0.02 | 0.34 | 0.18 | -    | -    | -    | -     |
| 5      | Sulcatone             | 27.08 | 0.36 | 0.11 | 0.04 | -    | -    | 0.02 | 0.11 | 0.07 | -    | 0.02 | 0.03 | 0.22  |
| 6      | 2-Undecanone          | 43.81 | -    | -    | -    | -    | -    | -    | -    | -    | -    | 0.02 | -    | -     |
| 7      | Damascenone           | 57.23 | 1.05 | 0.95 | 0.21 | 0.53 | 0.90 | 0.25 | 0.36 | 0.47 | -    | 0.04 | 0.08 | 1.50  |
| 8      | Geranylacetone        | 58.97 | -    | 0.11 | 0.21 | 0.05 | 0.03 | 0.05 | 0.29 | 0.14 | 0.03 | 0.03 | 0.03 | -     |
| 9      | 6-Methoxy-1-tetralone | 64.94 | 0.09 | -    | -    | -    | -    | -    | -    | -    | -    | -    | -    | -     |
| 10     | Phytone               | 71.45 | 0.03 | -    | 0.02 | -    | -    | -    | 0.06 | -    | -    | -    | -    | -     |
| 11     | Pseudoionone          | 71.88 | 0.02 | -    | -    | -    | -    | -    | -    | -    | -    | -    | -    | -     |
|        | Subtotal              |       | 1.96 | 1.41 | 0.67 | 0.58 | 0.93 | 0.38 | 1.25 | 0.87 | 0.14 | 0.11 | 0.14 | 1.72  |
| Acid   |                       |       |      |      |      |      |      |      |      |      |      |      |      |       |
| 1      | Hexanoic acid         | 59.79 | -    | -    | -    | -    | -    | -    | -    | 0.07 | -    | -    | -    | -     |
| 2      | Octanoic acid         | 70.25 | 0.02 | -    | 0.19 | -    | 0.12 | -    | -    | 0.04 | -    | -    | -    | -     |
| 3      | Nonanoic acid         | 73.26 | -    | -    | 3.81 | 0.16 | 2.31 | -    | -    | 0.33 | 0.38 | 0.08 | 0.04 | -     |
| 4      | Decanoic acid         | 76.15 | -    | -    | 0.24 | -    | 0.29 | -    | -    | 0.03 | -    | -    | -    | -     |
|        | Subtotal              |       | 0.02 | -    | 4.24 | 0.16 | 2.72 | -    | -    | 0.40 | 0.38 | 0.08 | 0.04 | -     |

Note: RT means retention time; FW means fresh weight; - means not detected.

#### IV. Principal component analysis (PCA) of VOCs in 12 pear cultivars

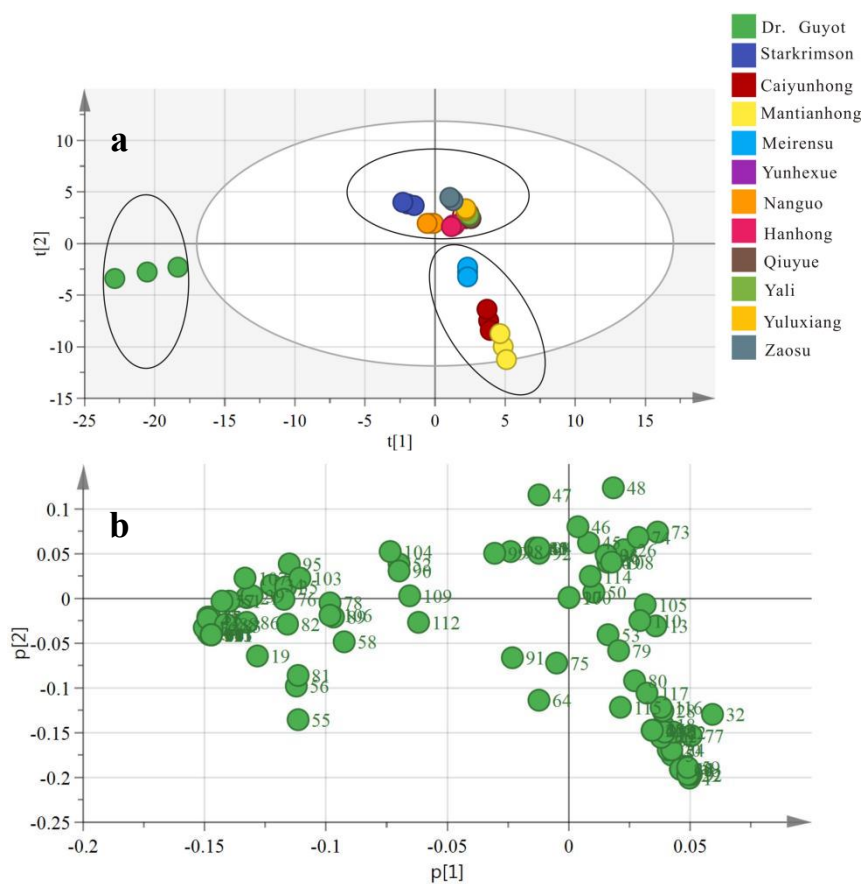

**Figure S3.** Principal component analysis (PCA) of VOCs in 12 pear cultivars. Note: (a) Scores scatter plot of PCA and (b) loadings plot of PCA analysis.

**v. The conversion pathway of VOCs in pear fruit during storage**

In this study, a series of flavor compounds with similar structure or synthesis route were detected, such as 2-octen-1-ol, octanol, octyl acetate, 2-octenal, 2-hexenyl acetate, hexyl acetate, 2-hexenal, hexanal, and hexanol. Those compounds could be formed from hydrogenation or dehydrogenation of other compounds.

As shown in Table 2, an increased content of octyl acetate (from 0.40 to 0.53 mg/kg FW) was associated with a decrease in 2-octen-1-ol (from 0.59 to undetectable) and 1-octanol (from 0.43 to 0.19 mg/kg FW) after 14 days storage. Furthermore, Dr. Guyot pear presented a reduced 2-octenal production after storage at 4 °C (from 0.75 to 0.31 mg/kg FW). Based on the results from the present study, it is possible that alcohols were the intermediates for conversion of aldehydes to esters (Figure S4a). However, this assumption was not confirmed due to the limitation of the experimental method used.

Similarly, pear fruit showed a rapid increase of hexyl acetate content (from 19.91 to 45.97 mg/kg FW) during storage. Meanwhile, 2-hexenal exhibited a decreasing trend (from 0.23 to 0.15 mg/kg FW). This result suggests that hexyl acetate was the 2-hexenal derived ester, and 1-hexanol was the intermediate (Figure S4b).

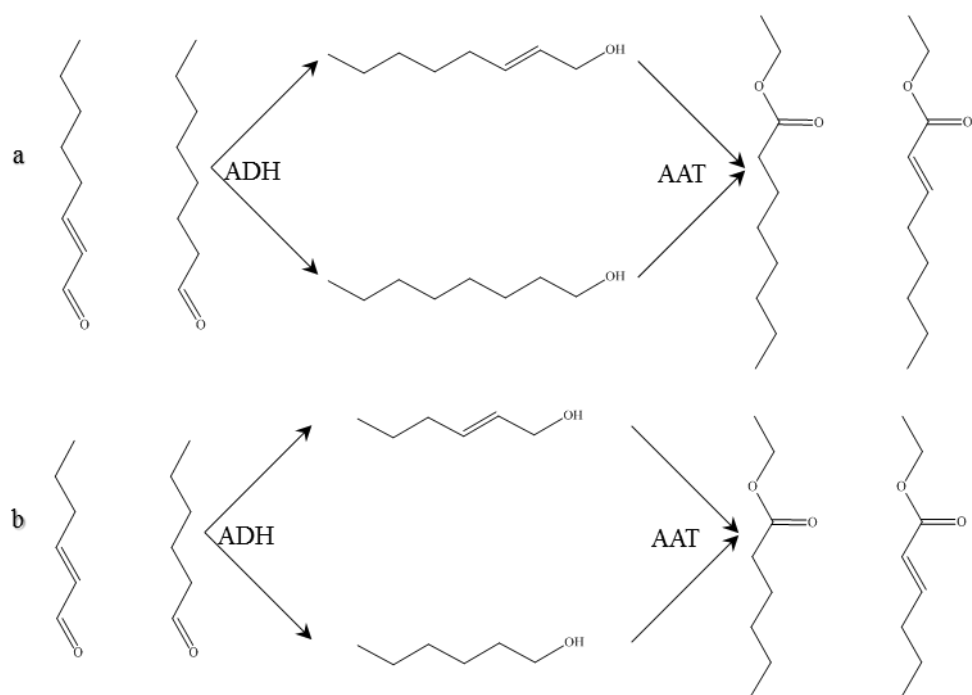

**Figure S4.** The conversion pathway of VOCs in pear fruit during storage. Note: ADH, alcohol dehydrogenase; AAT, alcohol o-acyltransferase.
